# Supplementary material
Source: Springer Nature journal article supplement (https://www.springermedizin.de/resource/supplementary/12903_2013_389_MOESM1_ESM.pdf/9516922)
Supplement: MOESM1 [file 9516922]

## Enrollment

Assessed for eligibility (n=153)

### Inclusion criteria

- good general health
- at least one primary molar with occlusal caries lesion
- the cavity should not be wider than 3 mm in diameter in enamel

Excluded (n= 117)  
Not meeting inclusion criteria (n=117)  
Declined to participate (n=0)  
Other reasons (n= 0)

Randomized (n=36)

## Allocation

Allocated to intervention sealants application (n=17)  
Received allocated intervention (n=17)

Allocated to intervention partial excavation and resin restoration (n=19)  
Received allocated intervention (n=19)

## 6-months Follow-Up

Lost to follow-up (patient did not show up at the control examination) (n=1)  
Discontinued intervention (n=0)

Lost to follow-up (n=0)  
Discontinued intervention (n=0)

## 12-months Follow-Up

Lost to follow-up (patient did not show at the control examination) (n=1)  
Discontinued intervention (n=0)

Lost to follow-up (n=0)  
Discontinued intervention (n=0)

## 18-months Follow-Up

Lost to follow-up (n=0)  
Discontinued intervention (n=0)

Lost to follow-up (n=2)  
Discontinued intervention (n=0)

## Analysis

Analysed (n=17)  
Excluded from analysis (n=0)

Analysed (n=19)  
Excluded from analysis (n=0)
